# Supplementary material for: Does reduced employment protection increase the employment disadvantage of workers with low education and poorer health?
Source: PubMed Central journal article supplement — J Epidemiol Community Health. 2020 Oct 1;74(10):851–7. doi: 10.1136/jech-2020-213772 (PMC7577106; doi:10.1136/jech-2020-213772), 2020-10-01
Supplement: jech-2020-213772s001.pdf [file jech-2020-213772s001.pdf]

Supplementary table S1 Employment protection for regular contracts, including collective dismissals, summary indicator weights of EPRC\_v2

| <b>Weight</b>                       | <b>Weight</b>                                                              | <b>Indicator</b>                                                      |
|-------------------------------------|----------------------------------------------------------------------------|-----------------------------------------------------------------------|
| Regular contracts<br><b>5/7</b>     | Procedural inconvenience<br><b>(1/3)</b>                                   | Notification procedures                                               |
|                                     |                                                                            | Delay involved before notice can start                                |
|                                     | Notice and severance pay for no-fault individual dismissal<br><b>(1/3)</b> | Length of the notice period at 9 months tenure                        |
|                                     |                                                                            | Length of the notice period at 4 years tenure                         |
|                                     |                                                                            | Length of the notice period at 20 years tenure                        |
|                                     |                                                                            | Severance pay at 9 months tenure                                      |
|                                     |                                                                            | Severance pay at 4 years tenure                                       |
|                                     |                                                                            | Severance pay at 20 years tenure                                      |
|                                     | Difficulty of dismissal<br><b>(1/3)</b>                                    | Definition of justified or unfair dismissal                           |
|                                     |                                                                            | Length of trial period                                                |
|                                     |                                                                            | Compensation following unfair dismissal                               |
|                                     |                                                                            | Possibility of reinstatement following unfair dismissal               |
|                                     |                                                                            | Maximum time to make a claim of unfair dismissal                      |
| Collective dismissals<br><b>2/7</b> |                                                                            | Definition of collective dismissal                                    |
|                                     |                                                                            | Additional notification requirements in case of collective dismissals |
|                                     |                                                                            | Additional delays involved in case of collective dismissals           |
|                                     |                                                                            | Other special costs to employers in case of collective dismissals     |

Supplementary table S2 Employment protection for temporary contracts, summary indicator weights of EPT

| <b>Weight</b>                                    | <b>Indicator</b>                                                        |
|--------------------------------------------------|-------------------------------------------------------------------------|
| Fixed-term contracts<br><b>(1/2)</b>             | Valid cases for use of fixed-term contracts                             |
|                                                  | Maximum number of successive fixed-term contracts                       |
|                                                  | Maximum cumulated duration of successive fixed-term contracts           |
| Temporary work agency employment<br><b>(1/2)</b> | Types of work for which temporary work agency (TWA) employment is legal |
|                                                  | Restrictions on the number of renewals of TWA assignments               |
|                                                  | Maximum cumulated duration of TWA assignments                           |
|                                                  | TWA: authorisation or reporting obligations                             |
|                                                  | Equal treatment of regular and agency workers at the user firm          |

Supplementary table S3 Employment protection of permanent workers and employment protection of temporary workers in 23 European countries between 2003 and 2014

| Country / Period          | EPRC_v2     |           |                    | EPT_v1      |           |                    |
|---------------------------|-------------|-----------|--------------------|-------------|-----------|--------------------|
|                           | Mean (sd)   | Min-max   | Annual change (sd) | Mean (sd)   | Min-max   | Annual change (sd) |
| <b>Northern Region</b>    |             |           |                    |             |           |                    |
| Denmark 2003-2012         | 2.41 (0.09) | 2.35-2.56 | -0.02 (0.000)      | 1.38 (0.00) | 1.38-1.38 | 0.00               |
| Finland 2004-2013         | 2.04 (0.03) | 2.01-2.08 | -0.01 (0.000)      | 1.56 (0.00) | 1.56-1.56 | 0.00               |
| Iceland 2008-2013         | 2.24 (0.00) | 2.24-2.24 | 0.00               | 0.63 (0.00) | 0.63-0.63 | 0.00               |
| Norway 2003-2012          | 2.38 (0.00) | 2.38-2.38 | 0.00               | 2.89 (0.12) | 2.75-3.00 | 0.03 (0.000)       |
| Sweden 2004-2013          | 2.58 (0.00) | 2.58-2.58 | 0.00               | 1.14 (0.31) | 0.81-1.44 | -0.09 (0.001)      |
| <b>Continental region</b> |             |           |                    |             |           |                    |
| Austria 2004-2013         | 2.62 (0.00) | 2.62-2.62 | 0.00               | 1.31 (0.00) | 1.31-1.31 | 0.00               |
| Belgium 2004-2013         | 2.84 (0.05) | 2.82-2.95 | 0.01 (0.000)       | 2.38 (0.00) | 2.38-2.38 | 0.00               |
| France 2004-2013          | 2.71 (0.03) | 2.67-2.73 | -0.01 (0.000)      | 3.63 (0.00) | 3.63-3.63 | 0.00               |
| Luxembourg 2008-2013      | 2.71 (0.00) | 2.71-2.71 | 0.00               | 3.75 (0.00) | 3.75-3.75 | 0.00               |
| The Netherlands 2005-2013 | 2.90 (0.03) | 2.87-2.93 | -0.01 (0.000)      | 0.94 (0.00) | 0.94-0.94 | 0.00               |
| <b>Southern region</b>    |             |           |                    |             |           |                    |
| Greece 2003-2013          | 2.82 (0.20) | 2.44-2.93 | -0.05 (0.000)      | 2.97 (0.80) | 2.25-4.75 | -0.18 (0.001)      |
| Italy 2004-2013           | 3.14 (0.05) | 2.98-3.15 | -0.01 (0.000)      | 2.00 (0.00) | 2.00-2.00 | 0.00               |
| Portugal 2004-2013        | 3.73 (0.31) | 2.81-3.98 | -0.11 (0.000)      | 2.24 (0.32) | 1.81-2.56 | -0.10 (0.001)      |
| Spain 2004-2013           | 2.72 (0.08) | 2.43-2.76 | -0.02 (0.000)      | 2.97 (0.24) | 2.56-3.25 | -0.08 (0.000)      |
| <b>Anglo-saxon region</b> |             |           |                    |             |           |                    |
| Ireland 2004-2013         | 1.89 (0.07) | 1.81-2.00 | 0.02 (0.000)       | 0.63 (0.00) | 0.63-0.63 | 0.00               |
| United Kingdom 2008-2013  | 1.25 (0.05) | 1.10-1.26 | -0.01 (0.000)      | 2.88 (0.00) | 2.88-2.88 | 0.00               |
| <b>Eastern region</b>     |             |           |                    |             |           |                    |
| Czech Republic 2008-2013  | 3.12 (0.14) | 2.92-3.31 | -0.05 (0.000)      | 2.13 (0.00) | 2.13-2.13 | 0.00               |
| Estonia 2008-2013         | 2.23 (0.17) | 2.11-2.46 | -0.08 (0.001)      | 2.07 (0.42) | 1.88-3.00 | 0.16 (0.003)       |
| Hungary 2008-2013         | 2.38 (0.06) | 2.17-2.40 | -0.01 (0.000)      | 1.15 (0.05) | 1.13-1.25 | 0.01 (0.000)       |
| Latvia 2012-2013          | 2.99 (0.00) | 2.99-2.99 | 0.00               | 0.88 (0.00) | 0.88-0.88 | 0.00               |
| Poland 2005-2013          | 2.41 (0.00) | 2.41-2.41 | 0.00               | 1.75 (0.00) | 1.75-1.75 | 0.00               |
| Slovakia 2008-2013        | 2.19 (0.11) | 1.71-2.22 | -0.02 (0.000)      | 3.73 (0.08) | 3.38-3.75 | -0.02 (0.000)      |
| Slovenia 2008-2013        | 2.84 (0.02) | 2.82-2.86 | -0.01 (0.000)      | 1.81 (0.00) | 1.81-1.81 | 0.00               |

EPRC\_v2 - employment protection of workers with permanent contracts

EPT\_v1 - employment protection of workers with temporary contracts

Supplementary table S4 Interaction of reduced employment protection and health status on different pathways out of paid employment within a follow-up period of one year among employed persons with good or poor health in 23 European countries of a rotating panel (EU-SILC) between 2003 and 2014 (n=334,999)

|                                                        | Increase in exit from paid employment |                          |                          |                                      |                            |
|--------------------------------------------------------|---------------------------------------|--------------------------|--------------------------|--------------------------------------|----------------------------|
|                                                        | Unemployment<br>OR (95%CI)            | Retirement<br>OR (95%CI) | Disability<br>OR (95%CI) | Economic<br>inactivity<br>OR (95%CI) | All pathways<br>OR (95%CI) |
| Decrease in employment protection of permanent workers |                                       |                          |                          |                                      |                            |
| Poor health                                            | 2.29 (1.64-3.19)                      | 5.62 (2.69-11.74)        | 18.8 (6.92-51.19)        | 1.00 (0.64-1.57)                     | 3.41 (2.50-4.65)           |
| Employment protection                                  | 0.85 (0.42-1.74)                      | 2.58 (1.30-5.10)         | 1.15 (0.61-2.16)         | 1.24 (0.72-2.14)                     | 1.16 (0.88-1.54)           |
| Poor health*employment protection                      | 1.17 (1.02-1.33)                      | 1.73 (1.39-2.15)         | 1.48 (0.95-2.30)         | 0.93 (0.79-1.09)                     | 1.31 (1.16-1.48)           |
| Decrease in employment protection of temporary workers |                                       |                          |                          |                                      |                            |
| Poor health                                            | 1.60 (1.31-1.94)                      | 1.23 (0.70-2.14)         | 8.28 (5.25-13.06)        | 0.98 (0.63-1.52)                     | 1.81 (1.43-2.30)           |
| Employment protection                                  | 1.36 (1.06-1.75)                      | 6.15 (3.09-12.22)        | 1.29 (0.80-2.10)         | 1.02 (0.58-1.80)                     | 1.56 (1.18-2.06)           |
| Poor health*employment protection                      | 1.02 (0.94-1.11)                      | 1.04 (0.81-1.34)         | 1.07 (0.90-1.27)         | 0.90 (0.58-1.80)                     | 1.05 (0.96-1.14)           |

OLS regression models including age, sex, education, GDP and employment protection\*health with fixed effects for country and year.

Supplementary table S5 Interaction of reduced employment protection and education on different pathways out of paid employment within a follow-up period of one year among employed persons with good or poor health in 23 European countries of a rotating panel (EU-SILC) between 2003 and 2014 (n=334,999)

|                                                        | Increase in exit from paid employment |                          |                          |                                      |                            |
|--------------------------------------------------------|---------------------------------------|--------------------------|--------------------------|--------------------------------------|----------------------------|
|                                                        | Unemployment<br>OR (95%CI)            | Retirement<br>OR (95%CI) | Disability<br>OR (95%CI) | Economic<br>inactivity<br>OR (95%CI) | All pathways<br>OR (95%CI) |
| Decrease in employment protection of permanent workers |                                       |                          |                          |                                      |                            |
| Education (mid)                                        | 3.41 (1.34-8.66)                      | 0.51 (0.30-0.87)         | 2.93 (1.13-7.64)         | 0.99 (0.61-1.63)                     | 1.66 (0.95-2.91)           |
| Education (low)                                        | 7.31 (2.54-21.07)                     | 0.87 (0.21-3.61)         | 5.41 (1.39-21.02)        | 1.28 (0.66-2.48)                     | 3.09 (1.40-6.83)           |
| Employment protection                                  | 0.67 (0.34-1.30)                      | 4.04 (1.88-8.66)         | 1.23 (0.58-2.57)         | 1.41 (0.80-2.47)                     | 1.22 (0.91-1.63)           |
| Mid educated * employment protection                   | 1.29 (0.92-1.81)                      | 0.74 (0.60-0.92)         | 1.22 (0.80-1.86)         | 0.90 (0.73-1.12)                     | 1.04 (0.84-1.28)           |
| Low educated * employment protection                   | 1.45 (1.00-2.12)                      | 0.86 (0.54-1.37)         | 1.31 (0.74-2.33)         | 0.82 (0.63-1.05)                     | 1.11 (0.82-1.19)           |
| Decrease in employment protection of temporary workers |                                       |                          |                          |                                      |                            |
| Education (mid)                                        | 2.06 (1.38-3.07)                      | 0.96 (0.60-1.52)         | 1.90 (1.45-2.50)         | 1.00 (0.64-1.55)                     | 1.46 (1.24-1.72)           |
| Education (low)                                        | 4.24 (2.51-7.16)                      | 1.39 (0.67-2.90)         | 3.20 (2.31-4.43)         | 1.43 (0.79-2.57)                     | 2.71 (2.14-3.45)           |
| Employment protection                                  | 1.21 (0.95-1.54)                      | 6.21 (2.82-13.66)        | 1.30 (0.81-2.08)         | 1.14 (0.68-1.94)                     | 1.53 (1.17-2.00)           |
| Mid educated * employment protection                   | 1.07 (0.94-1.22)                      | 0.93 (0.75-1.15)         | 1.02 (0.90-1.16)         | 0.89 (0.72-1.09)                     | 0.98 (0.92-1.04)           |
| Low educated * employment protection                   | 1.21 (1.02-1.45)                      | 1.03 (0.72-1.47)         | 1.07 (0.93-1.22)         | 0.82 (0.62-1.10)                     | 1.06 (0.97-1.17)           |

OLS regression models including age, sex, GDP and employment protection\*education with fixed effects for country and year.
